# Supplementary material for: Biosensor and chemo-enzymatic one-pot cascade applications to detect and transform PET-derived terephthalic acid in living cells
Source: PubMed Central journal article supplement (PMC9117539; doi:10.1016/j.isci.2022.104326), 2022-04-29
Supplement: mmc1.pdf [file mmc1.pdf]

**iScience, Volume 25**

**Supplemental information**

**Biosensor and chemo-enzymatic one-pot cascade  
applications to detect and transform PET-derived  
terephthalic acid in living cells**

**Thomas Bayer, Lara Pfaff, Yannick Branson, Aileen Becker, Shuke Wu, Uwe T. Bornscheuer, and Ren Wei**

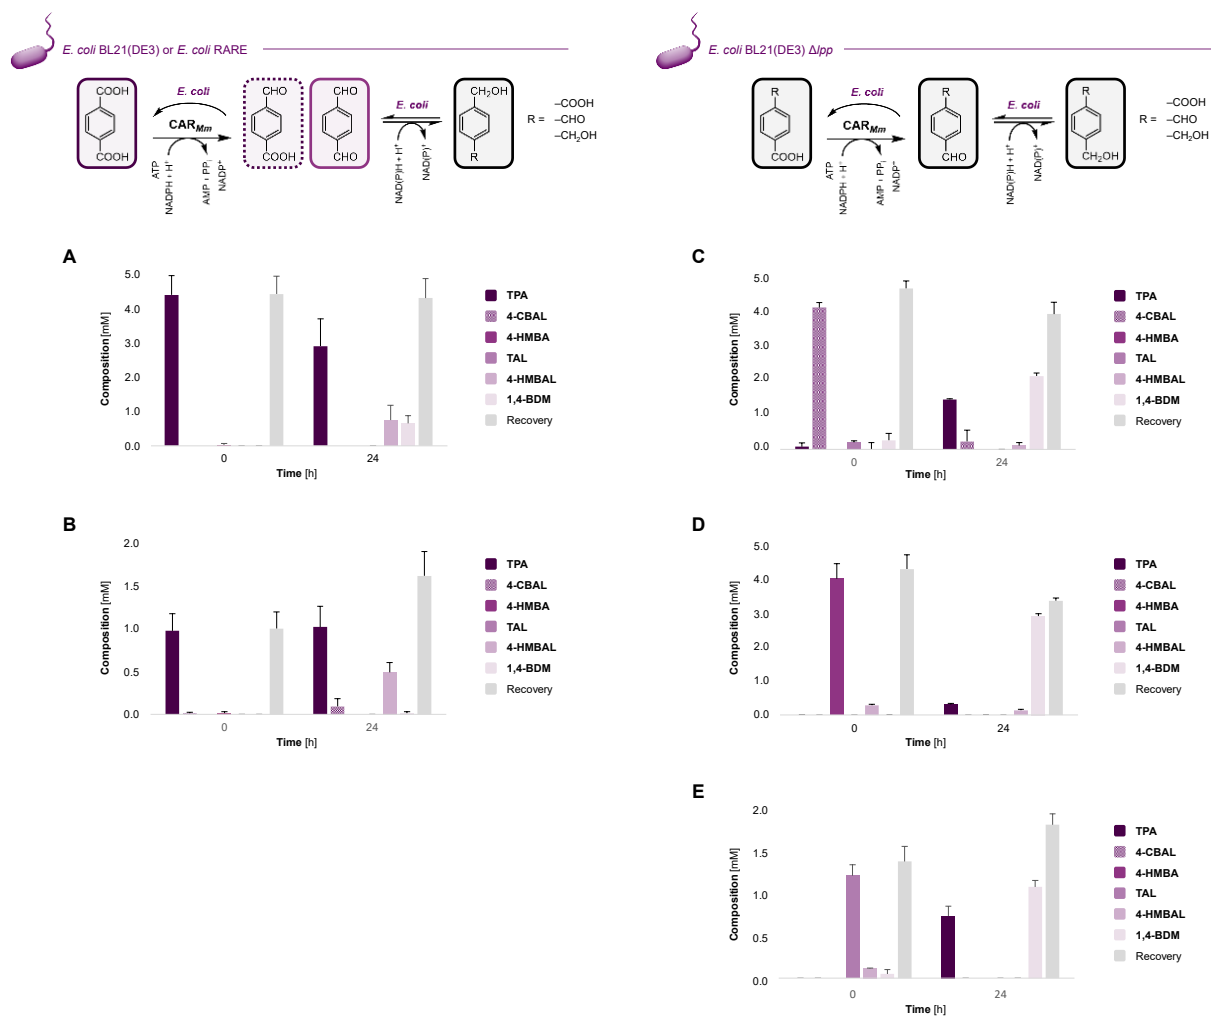

**Figure S1. CAR-catalyzed reductions of TPA and derivatives *in vivo*, related to Figure 2A. (A)** Bioreduction of TPA by  $CAR_{Mm}$  in *E. coli* BL21(DE3) yields a mixture of the over-reduced 4-HMBAL and 1,4-BDM, besides unreacted substrate. **(B)** Bioreduction of TPA by  $CAR_{Mm}$  in *E. coli* RARE mainly yields 4-HMBAL, indicating reduced aromatic aldehyde reducing activity compared to *E. coli* BL21(DE3), 4-CBAL, and unreacted TPA. **(C)**  $CAR_{Mm}$  reduces the carboxylate group in 4-CBAL to the corresponding TAL. Endogenous enzymes not only reduce aldehydes to the corresponding primary alcohols like 1,4-BDM but also oxidize them to the carboxylates as indicated by the detection of TPA after 24 h. This is in accordance with previous findings (Bayer et al., 2017). **(D)**  $CAR_{Mm}$  reduces the carboxylate group in 4-HMBA to the corresponding 4-HMBAL. Endogenous enzymes reduce the aldehydes to the corresponding primary alcohols like 1,4-BDM; TPA could be detected in traces after 24 h. **(E)** The highly reactive TAL is both oxidized and reduced by endogenous enzymes, yielding TPA and 1,4-BDM, respectively. On top, arrows indicate the activities of (host) enzymes;  $PPT_{Ni}$  necessary for posttranslational modification of  $CAR_{Mm}$  is omitted for clarity. Experiments were performed in RCs of *E. coli* ( $OD_{600} \approx 10.0$ ) co-expressing enzymes from  $pACYCDuet-1/car_{Mm}:ppt_{Ni}$  (Bayer et al., 2021) in the presence of 2–5 mM substrates and 5% (v/v) DMSO as organic co-solvent. Sampling: 0 h (after the addition of substrate and mixing) and 24 h. Recoveries were reduced due to low solubilities and/or the volatility of compounds. GC yields are presented as mean values + standard deviation (SD) [mM] of biological replicates ( $n \geq 3$ ).

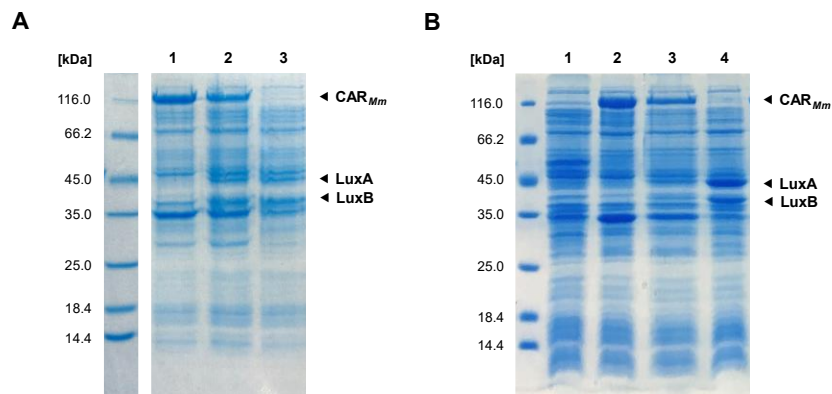

**Figure S2. SDS-PAGE analysis of whole-cell samples, related to Figure 2A, Figure S1, and STAR Methods.** (A) Expression of (1) CAR<sub>Mm</sub>/PPT<sub>Ni</sub> from pACYCDuet-1/*car<sub>Mm</sub>:ppt<sub>Ni</sub>* [CAR<sub>Mm</sub>: 129 kDa], (2) CAR<sub>Mm</sub>/PPT<sub>Ni</sub> and LuxAB from pLuxAB [LuxA: 43 kDa, LuxB: 37 kDa], and (3) LuxAB in *E. coli* BL21(DE3). (B) Whole-cell samples of (1) untransformed *E. coli* BL21(DE3)  $\Delta$ lpp or expressing (2) CAR<sub>Mm</sub>/PPT<sub>Ni</sub>, (3) CAR<sub>Mm</sub>/PPT<sub>Ni</sub> and LuxAB, and (4) LuxAB; PPT<sub>Ni</sub> [23 kDa] was not detectable due to low expression levels in corresponding samples. Proteins were produced from pACYCDuet-1/*car<sub>Mm</sub>:ppt<sub>Ni</sub>* and pLuxAB (Bayer et al., 2021); the detailed protocol is given in the main text. Sample loading normalized to OD<sub>600</sub> = 7.0; SDS-PAGE and gel staining performed as described in the main text. Irrelevant lanes were cropped in (A), the brightness of both pictures was increased by 20%; (◄) indicate protein bands of interest.

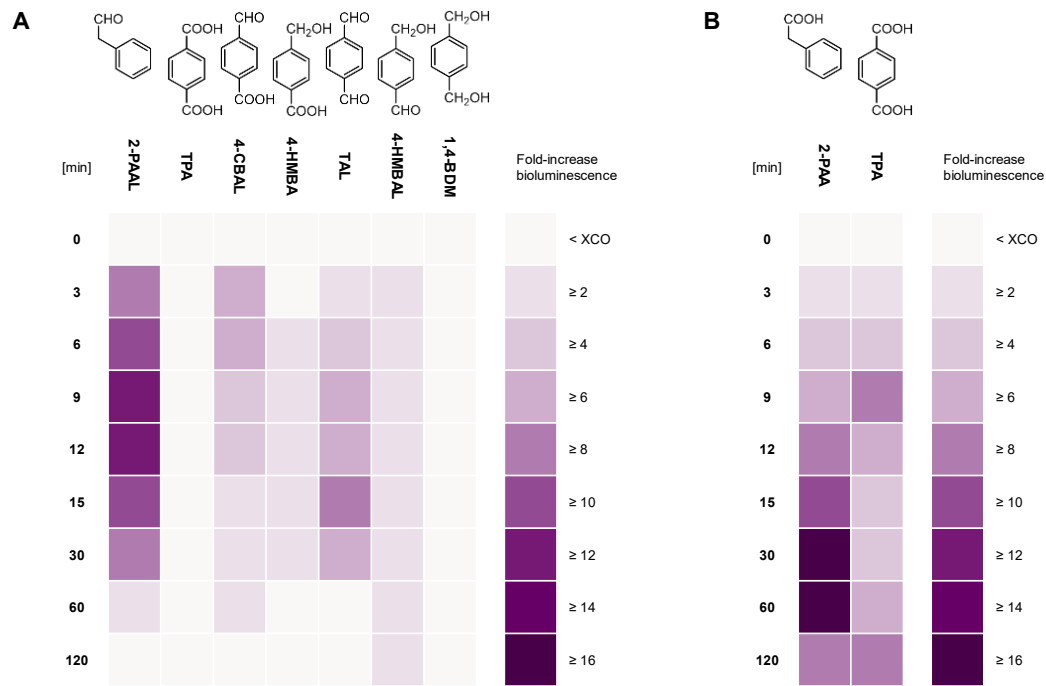

**Figure S3. LuxAB-based HT detection of aldehydes in *E. coli* RARE, related to Figure 2B–C. (A)** Direct detection of TPA-derived aldehydes (0.1 mM) by increasing bioluminescence over time in RCs of *E. coli* RARE expressing LuxAB from pLuxAB; 2-PAAL was used as the positive control. Whereas TPA and 1,4-BDM did not yield bioluminescence, the addition of 4-HMBA yielded background luminescence at 1 mM final concentration. **(B)** *In situ* production of aldehydes from 2-PAA and TPA (1 mM) in RCs of *E. coli* RARE co-expressing LuxAB and CAR<sub>Mm</sub>/PPT<sub>Ni</sub>. Experiments were performed in the presence of 1% (*v/v*) DMSO under HT assay conditions as described previously (Bayer et al., 2021) and in the main text; data presented as mean fold-increase bioluminescence obtained from biological replicates (*n* = 3).

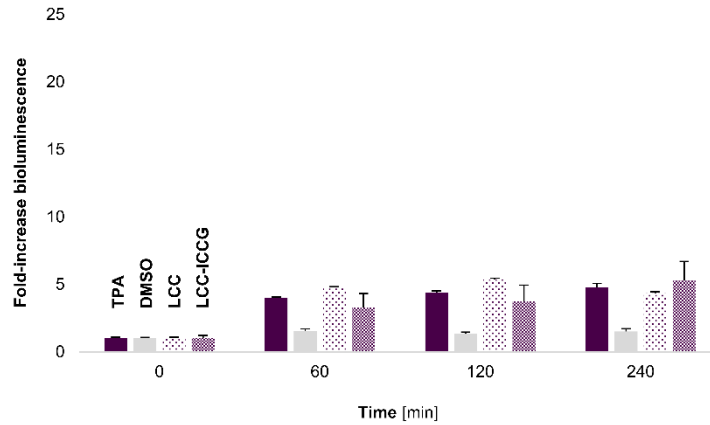

**Figure S4. PET hydrolysis samples analyzed under HT conditions in *E. coli* BL21(DE3)  $\Delta lpp$ , related to Figure 3.** The enzyme-coupled biosensor system yielded bioluminescence in the presence of 1 mM TPA (positive control) and hydrolysates obtained by the enzymatic degradation of Gf-PET films by wildtype LCC and the LCC-ICCG variant. The bioluminescence did not increase in the presence of 1% (v/v) DMSO over monitoring time (negative control). While the bioluminescence plateaued around 4-fold above background in *E. coli* BL21(DE3)  $\Delta lpp$  after 1 h incubation time, it increased in RCs of *E. coli* RARE proportionally to the amounts of TPA present in PET hydrolysis samples (see **Figure 3** in the main text). Experiments were performed in RCs of *E. coli* BL21(DE3)  $\Delta lpp$  under HT assay conditions as described previously (Bayer et al., 2021) and in the main text; data presented as mean values of the fold-increase in bioluminescence + SD of biological replicates (n = 3).

**Table S1.** List of DNA oligonucleotides, related to **STAR Methods**

| <b>Primer</b>               | <b>Sequence<br/>(5' – 3')</b>              |
|-----------------------------|--------------------------------------------|
| <i>lpp</i> -up_F            | gagtcgacctgcagaagcttGTAAAGAACTGGCTCTGCAGAG |
| <i>lpp</i> -up_R            | acaggtactaCCCTCTAGATTGAGTTAATCTCC          |
| <i>lpp</i> -down_F          | atctagagggTAGTACCTGTGAAGTGAAAAATG          |
| <i>lpp</i> -down_R          | gagctgcacatgaactcgagATGAATGCACCGGATATTAAGC |
| pTarget_F                   | ctcgagttcatgtgcagctc                       |
| pTarget_R                   | aagcttctgcaggtcgactc                       |
| $\Delta$ <i>lpp</i> -gRNA_F | AGTAGAACCCgtttagagctagaaatagcaagtt         |
| $\Delta$ <i>lpp</i> -gRNA_R | CTGCTGGCAGactagtattatacctaggactgagc        |

**Table S2.** HPLC yields of TPA in PET hydrolysates, related to **Figure 3** and **STAR Methods**

| <b>PET hydrolase</b> | <b>TPA yields [mM]</b> |
|----------------------|------------------------|
| PES-H1               | 56.0 $\pm$ 0.1         |
| LCC                  | 47.8 $\pm$ 3.1         |
| LCC-ICCG             | 111.1 $\pm$ 15.3       |

Yields are given as mean values  $\pm$  SDs of independent PET hydrolysis experiments and subsequent HPLC measurement for LCC (n = 3) and LCC-ICCG (n = 2) and as mean value  $\pm$  SD of a technical replicate (n = 2) for PES-H1.
